# Supplementary material for: Synthesis of radioiodinated probes to evaluate the biodistribution of a potent TRPC3 inhibitor
Source: Royal Society of Chemistry journal article supplement (doi:10.1039/c6md00023a), 2016-01-01
Supplement: c6md00023a1.pdf [file c6md00023a1.pdf]

## Supporting information

### **Synthesis of radioiodinated probes to evaluate the biodistribution of a potent TRPC3 inhibitor**

Masayori Hagimori,<sup>a</sup> Takahiro Murakami,<sup>a</sup> Kinue Shimizu,<sup>b</sup> Motohiro Nishida,<sup>b,c</sup>  
Takashi Ohshima<sup>b</sup> and Takahiro Mukai<sup>\*a</sup>

<sup>a</sup>*Kobe Pharmaceutical University, 4-19-1 Motoyamakita Machi, Higashinada-ku, Kobe 658-8558, Japan.*

<sup>b</sup>*Graduate School of Pharmaceutical Sciences, Kyushu University, 3-1-1 Maidashi, Higashi-ku, Fukuoka 812-8582, Japan*

<sup>c</sup>*Okazaki Institute for Integrative Bioscience (National Institute for Physiological Science), National Institutes of Natural Sciences, 5-1 Higashiyama, Okazaki, Aichi 444-8787, Japan.*

*\*Corresponding author. Tel.: +81-78-441-7539; fax: +81-78-441-7541; E-mail: tmukai@kobepharm-u.ac.jp*

## Materials and methods

Chemicals were of analytic grade and used as received. Na<sup>125</sup>I was purchased from MP Biomedical LLC. <sup>1</sup>H NMR spectra were measured using a Varian UNITY 400 (400 MHz) or a Varian Mercury 300 (300 MHz) or a Bruker ascend 600 (600 MHz) spectrometer. Chemical shifts are reported as ppm (in DMSO-d<sub>6</sub> or CDCl<sub>3</sub>). Mass spectra (MS) were recorded on a Waters LCT Premier XE system. HRMS were recorded using an Applied Biosystems Mariner System 5299 spectrometer. All melting points were determined using a Yanaco melting point apparatus (Yanagimoto Ind. Co., Kyoto, Japan) and are uncorrected. Infrared (IR) spectra were recorded in potassium bromide pellets using a Shimadzu-FT-IR 8400. HPLC analyses were performed using a Shimadzu LC-6AD equipped with a Shimadzu SPD-10A UV detector, a Shimadzu LC-6A equipped with a Shimadzu SPD-6A UV detector and a EG&G 40101A radioactivity detector, or a GL Science GL-7540 equipped with a Perkin Elmer FSA 505TR radioactivity detector.

## Chemistry

### (2-Bromo-4-nitrophenyl)hydrazine (**2**)

To a solution of 2-bromo-1-fluoro-4-nitrobenzene (325 mg, 1.5 mmol) in EtOH (10 mL), hydrazine hydrate was slowly added (75 mg, 1.5 mmol) over 15 min at 85°C. The solution was stirred for 1.5 h at 85°C and then allowed to cool to room temperature. The resulting precipitate was collected by filtration and **2** (301 mg, 89% yield) was obtained as a yellow solid, mp 138°C–139°C. IR (KBr, cm<sup>-1</sup>) v: 3354, 3320, 1349. <sup>1</sup>H NMR (400 MHz, DMSO-d<sub>6</sub>) δ 8.22 (s, 1H, 3-H), 8.09 (d, 1H, *J* = 8.6 Hz, 5-H), 7.94 (brs, 1H, NHNH<sub>2</sub>), 7.22 (d, 1H, *J* = 8.6 Hz, 6-H), 4.60 (brs, 2H, NHNH<sub>2</sub>).

**Ethyl 1-(2-bromo-4-nitrophenyl)-5-(trifluoromethyl)-1H-pyrazole-4-carboxylate**  
**(3)**

To a solution of **2** (299 mg, 1.3 mmol) in EtOH (12 mL), sulfuric acid was added (0.04 mL). The solution was refluxed for 4 h and then allowed to cool to room temperature. The resulting precipitate was collected by filtration and **3** (297 mg, 56% yield) was obtained as a milky white solid, mp 113°C–114°C. IR (KBr,  $\text{cm}^{-1}$ )  $\nu$ : 3122, 1717.  $^1\text{H}$  NMR (400 MHz,  $\text{CDCl}_3$ )  $\delta$  8.61 (s, 1H, 3-H), 8.34 (d, 1H,  $J = 7.2$  Hz, 5'-H), 8.23 (s, 1H, 3'-H), 7.62 (d, 1H,  $J = 8.6$  Hz, 6'-H), 4.40 (q, 2H,  $J = 7.2$  Hz,  $\text{CO}_2\text{CH}_2\text{CH}_3$ ), 1.40 (t, 3H,  $J = 7.2$  Hz,  $\text{CO}_2\text{CH}_2\text{CH}_3$ ). MS (FAB)  $m/z$ : 410  $[\text{M} + \text{H}^+]$  Anal. Calcd. for  $\text{C}_{13}\text{H}_9\text{BrF}_3\text{N}_3\text{O}_4 = 406.9729$ : C, 38.26; H, 2.22; N, 10.30%. Found: C, 38.29; H, 2.16; N, 10.36%.

**Ethyl 1-(4-amino-2-bromophenyl)-5-(trifluoromethyl)-1H-pyrazole-4-carboxylate**  
**(4)**

To a solution of **3** (2.89 g, 7.1 mmol) in EtOAc (260 mL), saturated ammonium chloride solution (44 mL) and zinc dust (6.0 g) were added, and the mixture was stirred for 4 h at 0°C. Saturated sodium hydrogen carbonate solution (80 mL) was added to the solution and the zinc dust was removed by filtration. The filtrate was diluted with EtOAc. The organic layers were separated and the aqueous layer was extracted with EtOAc. The combined organic layer were washed with brine, dried over anhydrous  $\text{Na}_2\text{SO}_4$ , and concentrated *in vacuo*. Purification by column chromatography on silica gel ( $\text{CHCl}_3$ :EtOAc = 9:1 eluent) yielded **4** (2.27 g, 85% yield) as a white solid, mp 93°C–94°C. IR (KBr,  $\text{cm}^{-1}$ )  $\nu$ : 3381, 3476, 1713.  $^1\text{H}$  NMR (400 MHz,  $\text{CDCl}_3$ )  $\delta$  8.13 (s, 1H,

3-H), 7.13 (d, 1H,  $J = 8.4$  Hz, 6'-H), 6.95 (s, 1H, 3'-H), 6.64 (d, 1H,  $J = 8.4$  Hz, 5'-H), 4.37 (q, 2H,  $J = 7.2$  Hz, CO<sub>2</sub>CH<sub>2</sub>CH<sub>3</sub>), 1.38 (t, 3H,  $J = 7.2$  Hz, CO<sub>2</sub>CH<sub>2</sub>CH<sub>3</sub>). MS (ESI)  $m/z$ : 400 [M + Na<sup>+</sup>] Anal. Calcd. for C<sub>13</sub>H<sub>11</sub>BrF<sub>3</sub>N<sub>3</sub>O<sub>2</sub> = 376.9987: C, 41.29; H, 2.93; N, 11.11%. Found: C, 41.53; H, 2.98; N, 11.05%.

**Ethyl 1-(4-amino-2-(tributylstannyl)phenyl)-5-(trifluoromethyl)-1H-pyrazole-4-carboxylate (5)**

To a solution of **4** (1.13 g, 3.0 mmol) in toluene (5.0 mL), bis(tri-*n*-butyltin) (3.0 mL, 6.0 mmol) and tetrakis(triphenylphosphine)palladium (173 mg, 0.015 mmol) were added, and the solution was refluxed for 2 h. The reaction mixture was quenched with saturated potassium fluoride solution and filtered through Celite. The filtrate was extracted with EtOAc and the combined organic layers were washed with brine, dried over anhydrous Na<sub>2</sub>SO<sub>4</sub>, and concentrated *in vacuo*. Purification by column chromatography on silica gel (CHCl<sub>3</sub>:EtOAc = 9:1 eluent) yielded **5** (964 mg, 55% yield) as a reddish-brown oil. <sup>1</sup>H NMR (400 MHz, CDCl<sub>3</sub>)  $\delta$  8.05 (s, 1H, 3-H), 6.99 (d, 1H,  $J = 8.4$  Hz, 6'-H), 6.81 (s, 1H, 3'-H), 6.62 (d, 1H,  $J = 8.6$  Hz, 5'-H), 4.37 (q, 2H,  $J = 7.2$  Hz, CO<sub>2</sub>CH<sub>2</sub>CH<sub>3</sub>), 1.43–1.35 (m, 9H, CO<sub>2</sub>CH<sub>2</sub>CH<sub>3</sub>, Sn(CH<sub>2</sub>CH<sub>2</sub>CH<sub>2</sub>CH<sub>3</sub>)<sub>3</sub>), 1.25 (m, 6H, Sn(CH<sub>2</sub>CH<sub>2</sub>CH<sub>2</sub>CH<sub>3</sub>)<sub>3</sub>) 0.85 (t, 6H,  $J = 7.6$  Hz, Sn(CH<sub>2</sub>CH<sub>2</sub>CH<sub>2</sub>CH<sub>3</sub>)<sub>3</sub>), 0.77 (t, 9H,  $J = 8.6$  Hz, Sn(CH<sub>2</sub>CH<sub>2</sub>CH<sub>2</sub>CH<sub>3</sub>)<sub>3</sub>). MS (ESI)  $m/z$ : 612 [M + Na<sup>+</sup>], HRMS (ESI) Calcd. for C<sub>25</sub>H<sub>38</sub>F<sub>3</sub>N<sub>3</sub>O<sub>2</sub>Sn [M + Na<sup>+</sup>]: 612.1836, found 612.1840.

**Ethyl 1-(4-amino-2-iodophenyl)-5-(trifluoromethyl)-1H-pyrazole-4-carboxylate (6)**

To a solution of **5** (59 mg, 0.10 mmol) in CH<sub>2</sub>Cl<sub>2</sub> (3.4 mL), 0.1 M iodine solution (29 mg, 0.24 mmol) was added, and the solution was stirred at room temperature. After

stirring for 30 min, the mixture was quenched with sodium sulfite solution, and the resulting mixture was diluted with water. The mixture was extracted with CH<sub>2</sub>Cl<sub>2</sub> and the combined organic layers were washed with brine, dried over anhydrous Na<sub>2</sub>SO<sub>4</sub>, and concentrated *in vacuo*. Purification by column chromatography on silica gel (hexane:EtOAc = 5:1 eluent) yielded **6** (37 mg, 87% yield) as a white solid, mp 149°C–150°C. IR (KBr, cm<sup>-1</sup>)  $\nu$ : 3349, 3364, 1728. <sup>1</sup>H NMR (400 MHz, CDCl<sub>3</sub>)  $\delta$  8.13 (s, 1H, 3-H), 7.19 (d, 1H, *J* = 8.6 Hz, 6'-H), 7.09 (s, 1H, 3'-H), 6.67 (d, 1H, *J* = 8.6 Hz, 5'-H), 4.37 (q, 2H, *J* = 7.2 Hz, CO<sub>2</sub>CH<sub>2</sub>CH<sub>3</sub>), 1.44 (t, 3H, *J* = 7.2 Hz, CO<sub>2</sub>CH<sub>2</sub>CH<sub>3</sub>). MS (ESI) *m/z*: 426 [M + H<sup>+</sup>]. HRMS (ESI) Calcd. for C<sub>13</sub>H<sub>11</sub>F<sub>3</sub>IN<sub>3</sub>O<sub>2</sub> [M + H<sup>+</sup>]: 425.9927, found 425.9938. Anal. Calcd for C<sub>13</sub>H<sub>11</sub>F<sub>3</sub>IN<sub>3</sub>O<sub>2</sub> = 424.9848: C, 36.73; H, 2.61; N, 9.88%. Found: C, 36.77; H, 2.60; N, 9.88%.

**Ethyl 1-(2-(tributylstannyl)-4-(2,3,3-trichloroacrylamido)phenyl)-5-(trifluoromethyl)-1*H*-pyrazole-4-carboxylate (7)**

A mixture of thionyl chloride (9 mL, 124 mmol) and trichloroacrylic acid (515 mg, 2.96 mmol) was stirred at 75°C for 16.5 h. After the solution was concentrated *in vacuo*, the resulting mixture was diluted with CH<sub>2</sub>Cl<sub>2</sub>. A solution of **5** (572 mg, 1.0 mmol) in CH<sub>2</sub>Cl<sub>2</sub> and *N,N*-diisopropylethylamine (0.5 mL, 2.91 mmol) were added to the mixture and the solution was stirred at 0°C for 2.5 h. After water was added to the reaction mixture, the mixture was extracted with CH<sub>2</sub>Cl<sub>2</sub>, and the combined organic layers were dried over anhydrous Na<sub>2</sub>SO<sub>4</sub> and concentrated *in vacuo*. Purification by column chromatography on silica gel (hexane:EtOAc = 8:1 eluent) yielded **7** (381 mg, 53% yield) as a reddish-brown oil. <sup>1</sup>H NMR (400 MHz, CDCl<sub>3</sub>)  $\delta$  8.09 (s, 1H, 3-H), 7.75 (d, 1H, *J* = 8.6 Hz, 5'-H), 7.61 (s, 1H, 3'-H), 7.22 (d, 1H, *J* = 8.6 Hz, 6'-H), 4.38 (q, 2H, *J*

= 7.2 Hz), 1.39 (t, 3H,  $J = 7.2$  Hz,  $\text{CO}_2\text{CH}_2\text{CH}_3$ ), 1.22–1.35 (m, 12H,  $\text{Sn}(\text{CH}_2\text{CH}_2\text{CH}_2\text{CH}_3)_3$ ), 0.92 (t, 6H,  $J = 7.2$  Hz,  $\text{Sn}(\text{CH}_2\text{CH}_2\text{CH}_2\text{CH}_3)_3$ ), 0.85 (9H, t,  $J = 7.2$  Hz,  $\text{Sn}(\text{CH}_2\text{CH}_2\text{CH}_2\text{CH}_3)_3$ ). MS (ESI)  $m/z$ : 768  $[\text{M} + \text{Na}^+]$ . HRMS (ESI) calcd. for  $\text{C}_{28}\text{H}_{37}\text{Cl}_3\text{F}_3\text{N}_3\text{O}_3\text{Sn}$   $[\text{M} + \text{Na}^+]$  768.0752, found 768.0733.

**Ethyl 1-(2-iodo-4-(2,3,3-trichloroacrylamido)phenyl)-5-(trifluoromethyl)-1H-pyrazole-4-carboxylate (I-Pyr3)**

A mixture of thionyl chloride (3 mL, 41 mmol) and trichloroacrylic acid (164 mg, 0.94 mmol) was stirred at room temperature for 15 min, and then slowly warmed to 75°C. After the solution was stirred for 6.5 h, thionyl chloride (3 mL, 41 mmol) was added and the solution was stirred for 30 min. After the solution was concentrated *in vacuo*, the resulting mixture was diluted with  $\text{CH}_2\text{Cl}_2$ . Added to the mixture was a solution of **6** (132 mg, 0.31 mmol) in  $\text{CH}_2\text{Cl}_2$  and *N,N*-diisopropylethylamine (0.1 mL, 0.31 mmol), and the solution was stirred at 0°C for 1 h. After water was added to the reaction mixture, the mixture was extracted with  $\text{CH}_2\text{Cl}_2$ , and the combined organic layer was dried over anhydrous  $\text{Na}_2\text{SO}_4$ , and concentrated *in vacuo*. Purification by column chromatography on silica gel (hexane/EtOAc 3/1) gave I-Pyr3 (139 mg, 60% yield) as a white solid.  $^1\text{H}$  NMR (300 MHz,  $\text{CDCl}_3$ )  $\delta$  8.26 (1H, s, NH), 8.18 (s, 1H, 3'-H), 8.15 (s, 1H, 3-H), 7.72 (d, 1H,  $J = 8.6$  Hz, 5'-H), 7.34 (q, 1H,  $J = 8.6$  Hz, 6'-H), 4.39 (q, 2H,  $J = 7.2$  Hz,  $\text{CO}_2\text{CH}_2\text{CH}_3$ ), 1.39 (t, 3H,  $J = 7.2$  Hz,  $\text{CO}_2\text{CH}_2\text{CH}_3$ ).  $^{13}\text{C}$  NMR (150 MHz,  $\text{CDCl}_3$ )  $\delta$ : 160.7, 157.9, 143.0, 139.0, 138.9, 130.2, 129.4, 128.5, 122.8, 120.0, 119.7, 117.9, 116.5, 96.7, 61.4, 14.1. MS (ESI)  $m/z$ : 581  $[\text{M} + \text{H}^+]$  HRMS (ESI) Calcd. for  $\text{C}_{16}\text{H}_{10}\text{Cl}_3\text{F}_3\text{IN}_3\text{O}_3$   $[\text{M} + \text{H}^+]$ : 581.8864, found 581.8868. Anal. Calcd for

$C_{16}H_{10}Cl_3F_3IN_3O_3 = 580.8785$ : C, 32.99; H, 1.73; N, 7.21%. Found: C, 33.03; H, 1.74; N, 7.17%.

**1-(2-Iodo-4-(2,3,3-trichloroacrylamido)phenyl)-5-(trifluoromethyl)-1H-pyrazole-4-carboxylic acid (I-Pyr8)**

To a solution of I-Pyr3 (78 mg, 0.10 mmol) in EtOH (5 mL), 1M potassium hydroxide solution (0.1 mL) was added at 0°C. The resulting solution was stirred at room temperature. The reaction mixture was neutralized with HCl and extracted with EtOAc. The combined organic layers were dried over anhydrous  $Na_2SO_4$  and concentrated *in vacuo*. Purification by column chromatography on silica gel (EtOAc eluent) yielded **12** (13 mg, 18% yield) as a yellow solid, mp 199°C–200°C.  $^1H$  NMR (300 MHz, DMSO- $d_6$ )  $\delta$  11.37 (s, 1H, CO<sub>2</sub>H), 8.30 (s, 1H, 3-H), 8.28 (s, 1H, 3'-H), 7.71 (d, 1H,  $J = 8.7$  Hz, 5'-H), 7.63 (q, 1H,  $J = 8.7$  Hz, 6'-H).  $^{13}C$  NMR (150 MHz, DMSO- $d_6$ )  $\delta$ : 161.7, 159.0, 142.8, 140.0, 138.1, 129.1, 128.9, 128.2, 123.8, 122.9, 119.9, 117.9, 116.9, 98.0. MS (ESI)  $m/z$ : 553 [M – H<sup>+</sup>] HRMS (ESI) Calcd. for  $C_{14}H_6Cl_3F_3IN_3O_3$  [M – H<sup>+</sup>]: 551.8394, found 551.8403.

**Ethyl 1-(4-(2,3,3-trichloroacrylamido)phenyl)-5-(trifluoromethyl)-1H-pyrazole-4-carboxylate (Pyr3)<sup>18</sup>**

To a solution of ethyl 1-(4-aminophenyl)-5-(trifluoromethyl)-1H-pyrazole-4-carboxylate (23.3 mg, 0.08 mmol) in dry DMF (2 mL), 2,3,3-trichloroacrylic acid (32 mg, 0.18 mmol), BOP reagent (127 mg, 0.29 mmol), and *N,N*-diisopropylethylamine (4 mg, 0.03 mmol) were added. The reaction mixture was refluxed under an argon atmosphere for 6 h at room temperature. After the solution was concentrated *in vacuo*,

the residue was diluted with EtOAc, washed with 10% citric acid solution and brine, dried over anhydrous Na<sub>2</sub>SO<sub>4</sub>, and concentrated *in vacuo*. Purification by column chromatography on silica gel (hexane:EtOAc = 6:1 eluent) yielded Pyr3 (15 mg, 42% yield) as a white solid, mp 148°C–150°C. IR (KBr, cm<sup>-1</sup>)  $\nu$ : 3246, 1744, 1659. <sup>1</sup>H NMR (400 MHz, CDCl<sub>3</sub>)  $\delta$  8.06 (s, 1H, 3-H), 7.73 (d, 4H, *J* = 8.6 Hz, 5'-H), 7.44 (d, 4H, *J* = 8.6 Hz, 6'-H), 4.38 (q, 2H, *J* = 7.2 Hz, CO<sub>2</sub>CH<sub>2</sub>CH<sub>3</sub>), 1.39 (t, 3H, *J* = 7.2 Hz, CO<sub>2</sub>CH<sub>2</sub>CH<sub>3</sub>). MS (ESI) *m/z*: 479 [M + Na<sup>+</sup>].

### 1-(4-(2,3,3-Trichloroacrylamido)phenyl)-5-(trifluoromethyl)-1*H*-pyrazole-4-carboxylic acid (Pyr8)

To a solution of Pyr3 (48 mg, 0.10 mmol) in EtOH (5 mL), 1 M potassium hydroxide solution (0.1 mL) was added at 0°C, and the solution was stirred at room temperature. The reaction mixture was neutralized with HCl and extracted with EtOAc. The combined organic layers were dried over anhydrous Na<sub>2</sub>SO<sub>4</sub> and concentrated *in vacuo*. Purification by column chromatography on silica gel (EtOAc eluent) yielded Pyr8 (45 mg, 100% yield) as a white solid. IR (KBr, cm<sup>-1</sup>)  $\nu$ : 3448, 3286, 1667, 1258. <sup>1</sup>H NMR (400 MHz, CDCl<sub>3</sub>)  $\delta$  8.18 (s, 1H, 3-H), 7.74 (d, 4H, *J* = 8.8 Hz, 5'-H), 7.45 (q, 4H, *J* = 8.8 Hz, 6'-H). MS (ES) *m/z*: 451 [M + Na<sup>+</sup>].

### Spectral data

```
EXP 11
exp2 st61h
SAMPLE:
date Jan 22 2014 dfrq DEC. 4 VT 300.088
solvent CDCl3 dn H1
file exp dpwr 30
ACQUISITION exp dot 0
sfrq 300.088 dm nmh
tn 32 dm 0
at 4.000 dmf 200
sp 35988 PROCESSING
sw 4499.4 wfile
fb 2400 proc ft
bn 4 fn not used
tpwr 58
pw 7.0 werr
dl 1.000 wexp
tof 0 wds wfc
at 8 wnt wfc
ct 8
slock n
gain not used
ll FLAGS n
```



Fig. S1 <sup>1</sup>H NMR of I-Pyr3 in CDCl<sub>3</sub>

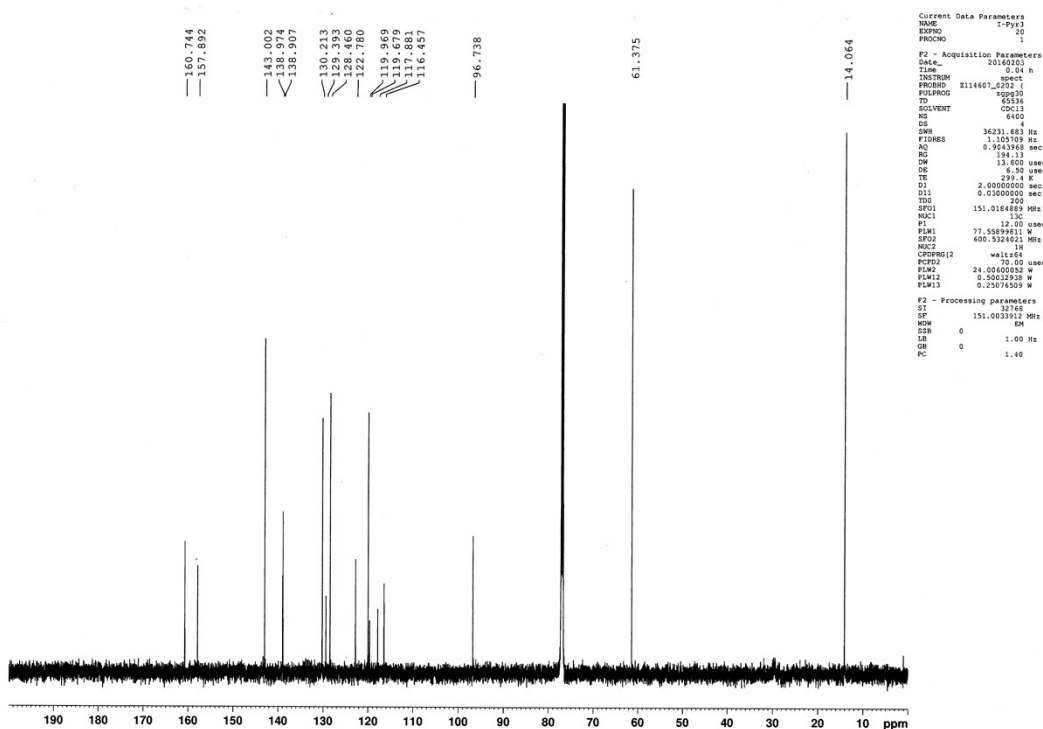

Fig. S2 <sup>13</sup>C NMR of I-Pyr3 in CDCl<sub>3</sub>

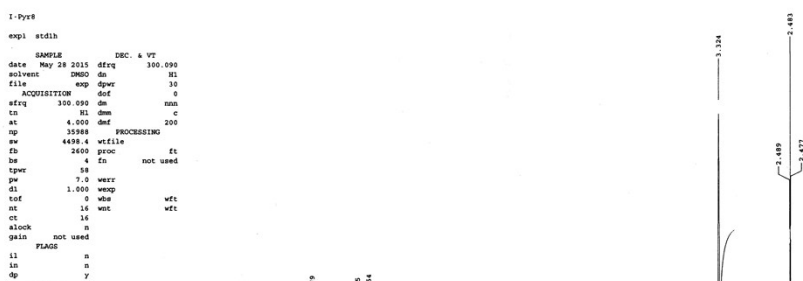

Fig. S3 <sup>1</sup>H NMR of I-Pyr8 in DMSO-d<sub>6</sub>

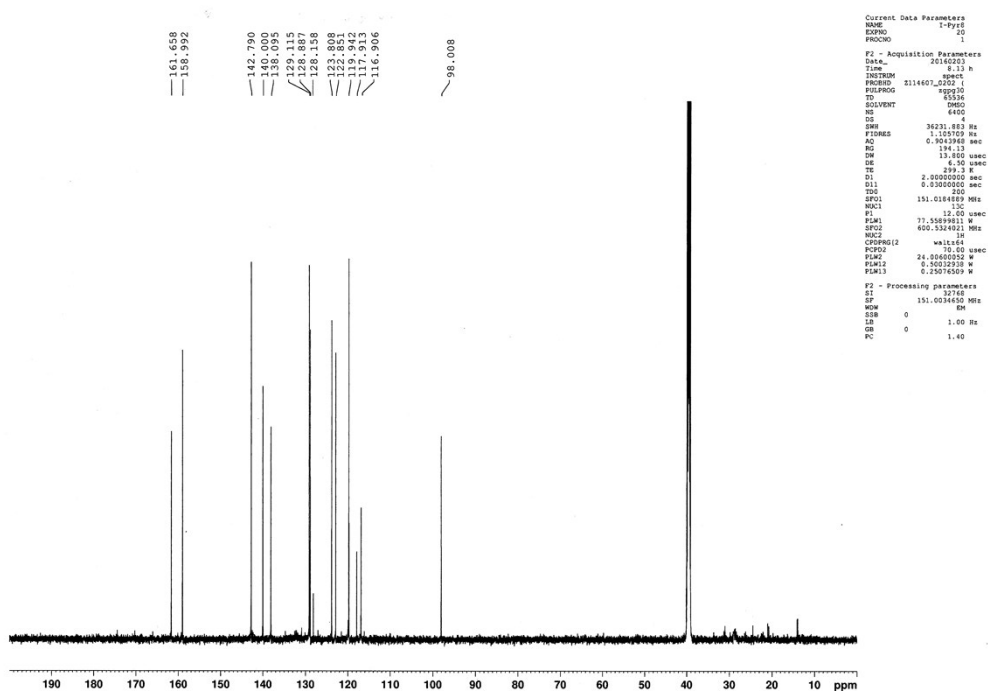

Fig. S4 <sup>13</sup>C NMR of I-Pyr8 in DMSO-d<sub>6</sub>

## Measurement of Intracellular Ca<sup>2+</sup> Concentration

HEK293 cells were transfected with TRPC3-pCIneo with or without pEGFP-F vector using fugene 6. Twenty-four hour after transfection, the cells were trypsinized and plated in a 24-well plate containing coverslips at  $2 \times 10^4$  cells/well. The cells were loaded with 1  $\mu$ M Fura-2 AM at 37°C for 40 min. Images of the Fura-2 fluorescence of GFP-positive cells were recorded in HEPES-buffered saline (10 mM HEPES (pH 7.4), 140 mM NaCl, 1.13 mM MgCl<sub>2</sub>, 4.7 mM KCl, 2 mM CaCl<sub>2</sub>, and 10 mM glucose) and analyzed with a video image analysis system (Aqua Cosmos, Hamamatsu Photonics). Results are represented as the mean  $\pm$  SEM (n = 45–92). GFP-positive cells were measured in each experiment and all experiments were repeated at least twice.

### **Preparation of [<sup>125</sup>I]I-Pyr3**

To a solution of tributyltin derivative **7** (100  $\mu$ g, 0.13  $\mu$ mol) in methanol (10  $\mu$ L), a solution of chloramine-T (300  $\mu$ g, 1.31  $\mu$ mol) in methanol (40  $\mu$ L), acetic acid (10  $\mu$ L), and a solution of sodium [<sup>125</sup>I]iodide (1.2 MBq) were added, and adjusted to pH 5.0 with 0.1 M NaOH. The reaction mixture was incubated for 2 h at 35°C and a solution of 10 mg/mL Na<sub>2</sub>S<sub>2</sub>O<sub>5</sub> (20  $\mu$ L) was added to quench the reaction. The product was purified using HPLC on a 4.6  $\times$  250 mm COSMOSIL 5C18-AR II column eluted with acetonitrile and water containing 0.1% TFA (65:35) at a flow rate of 0.9 mL/min.

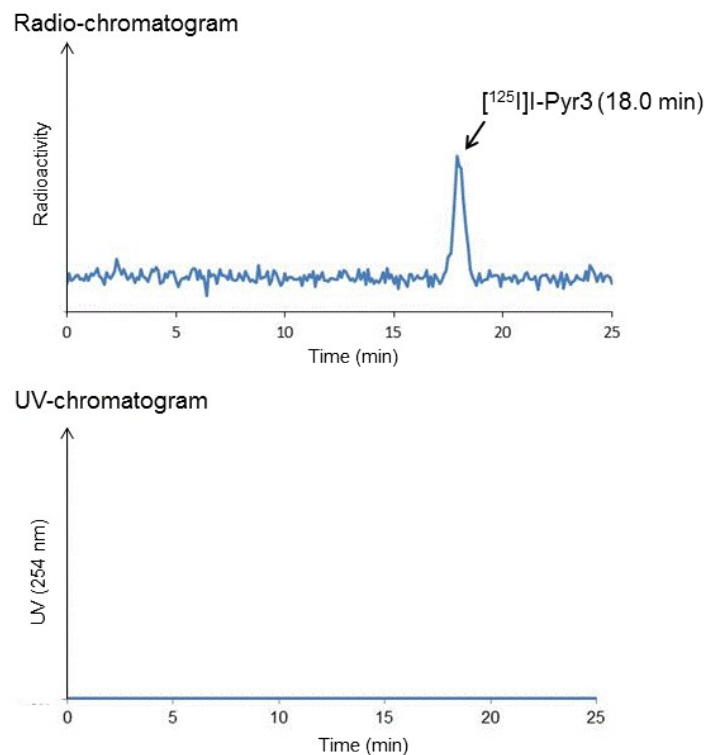

Fig. S5 The radio- and UV-chromatograms of [<sup>125</sup>I]-Pyr3. The retention time of [<sup>125</sup>I]-Pyr3 (18.0 min) was measured with a radioactivity detector.

### Preparation of [<sup>125</sup>I]-Pyr8

To a solution of [<sup>125</sup>I]-Pyr3 (500  $\mu$ L, 0.52 MBq) in methanol/H<sub>2</sub>O (3/1), a solution of 1M NaOH (50  $\mu$ L) was added. The reaction mixture was incubated for 30 min at 50°C. The product was purified using HPLC on a 4.6  $\times$  250 mm COSMOSIL 5C18-AR II column eluted with acetonitrile and water containing 0.1% TFA (65:35) at a flow rate of 0.9 mL/min.

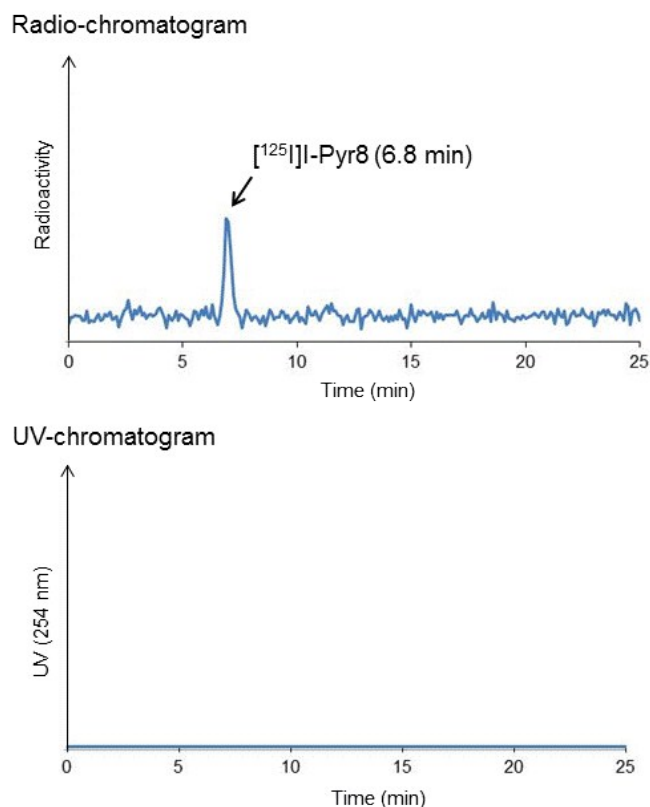

Fig. S6 The radio- and UV-chromatograms of [<sup>125</sup>I]-Pyr8. The retention time of [<sup>125</sup>I]-Pyr8(6.8 min) was measured with a radioactivity detector.

### Stability study

The stability of [<sup>125</sup>I]-Pyr3 in PB and mouse plasma was determined by incubating 44 kBq purified [<sup>125</sup>I]-Pyr3 in solutions containing 20 mM PB (pH 7.4) or 250  $\mu$ L mouse plasma at 37°C for 0, 1, 3, 6, and 24 h. Plasma proteins were precipitated by adding 500  $\mu$ L methanol after centrifugation at 1000  $\times g$  for 5 min at 4°C. The radiochemical purity was analyzed by TLC (hexane:EtOAc = 2:1 eluent).

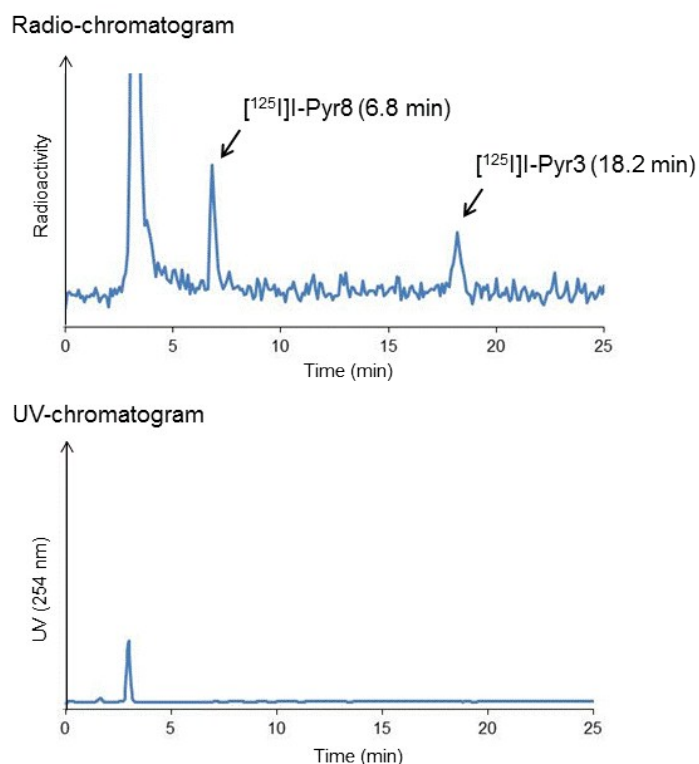

Fig. S7 Metabolite profile of [ $^{125}\text{I}$ ]I-Pyr3 after incubation for 30 min in mouse plasma.

### ***In vivo* biodistribution in normal mice**

*In vivo* biodistribution studies were approved by the Kobe Pharmaceutical University Committee on Animal Research and Ethics and performed in six-week-old male ddy mice. A solution of radioiodinated ligands (18.5 kBq, 100  $\mu\text{L}$ ) in PB (pH 7.4) was injected directly into the tail vein. The mice were sacrificed at various time points (10 min, 30 min, 1 h, 3 h, and 24 h) post-injection. The organs of interest were removed and weighed. The radioactivity of the organs was counted with an automatic  $\gamma$ -counter (Perkin Elmer 2480 WIZARD<sup>2</sup>). The percentage dose per gram of organ and the percentage dose per organ were calculated.
